# Supplementary material for: General synthesis for supported single-atom catalysts using hydroxyl nests in zeolites
Source: Royal Society of Chemistry journal article supplement (doi:10.1039/d4tc02758b), 2024-01-01
Supplement: d4tc02758b1.pdf [file d4tc02758b1.pdf]

## ***Supporting Information for***

# **General synthesis for supported single-atom catalysts using hydroxyl nests in zeolites**

Qiang Liu,<sup>a</sup> Jingnan Wang,<sup>b</sup> Kaiheng Zhao,<sup>c</sup> Yongan Yang<sup>d</sup> and Xi Wang<sup>\*e,f</sup>

<sup>a</sup> School of Chemical Engineering and Technology, Tianjin University, Molecular Plus and Collaborative Innovation Center of Chemical Science and Engineering, Tianjin, China

<sup>b</sup> Molecular Engineering Plus, College of Chemistry, Fuzhou University, Fuzhou 350108, China

<sup>c</sup> Key Laboratory of Photochemistry Institute of Chemistry, Chinese Academy of Sciences, Beijing 100190, China

<sup>d</sup> Institute of Molecular Plus, Department of Chemistry, Tianjin University, Tianjin 300072, China

<sup>e</sup> Key Laboratory of Luminescence and Optical Information, Ministry of Education, School of Physical Science and Engineering, Beijing Jiaotong University, Beijing 100044, China

<sup>f</sup> Tangshan Research Institute of Beijing Jiaotong University, Tangshan 063000, China

**KEYWORDS:** Single-atom catalysts, High-temperature catalysis, Hydroxyl-nests, Propane dehydrogenation, General synthesis.

**\* Corresponding author**

Email: xiwang@bjtu.edu.cn

**Equations:**

**Corrected peak area:**

$$A_i = nA_jF_j$$

$A_i$  was the relative quantity of the hydrocarbon products,  $n$  was the carbon number of hydrocarbons,  $A_j$  was the peak area given by the FID results, and  $F_j$  was the relative correction factor.

**Propane conversion was calculated as follows:**

$$\text{Conversion} = \frac{\Sigma A_i}{\Sigma A_i + A_{C_3H_8}}$$

**The selectivity of hydrocarbon products is calculated as follows:**

$$\text{Selectivity}_i = \frac{A_i}{\Sigma A_i}$$

**The yield of hydrocarbon products is calculated as follows:**

$$\text{Yield} = \frac{A_i}{\Sigma A_i + A_{C_3H_8}}$$

**Carbon balance (> 95%) is calculated as follows:**

$$\text{Carbon balance} = \frac{\Sigma A_i}{A_{C_3H_8}}$$

**The deactivation rate is calculated as follows:**

$$k_d(\text{h}^{-1}) = \frac{\ln\left(\frac{1 - X_{end}}{X_{end}}\right) - \ln\left(\frac{1 - X_{start}}{X_{start}}\right)}{t}$$

where  $X_{start}$  and  $X_{end}$  represent the conversion at the start and the end of an experiment, and  $t$  is the duration of the experiment in hours, higher  $k_d$  values being indicative of rapid deactivation, that is, low stability.

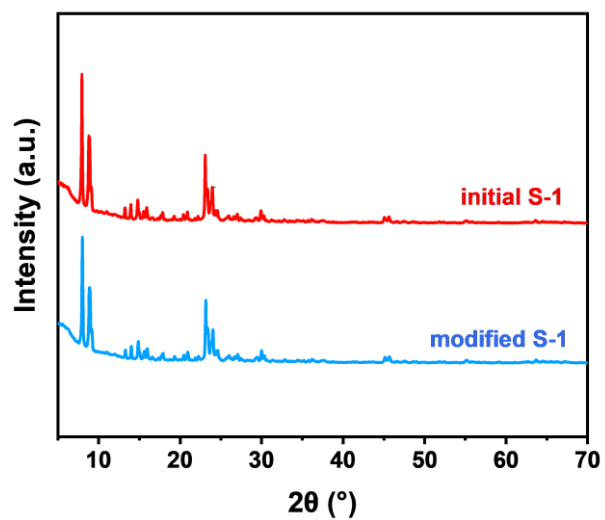

Figure S1. The XRD spectra of S-1 zeolite.

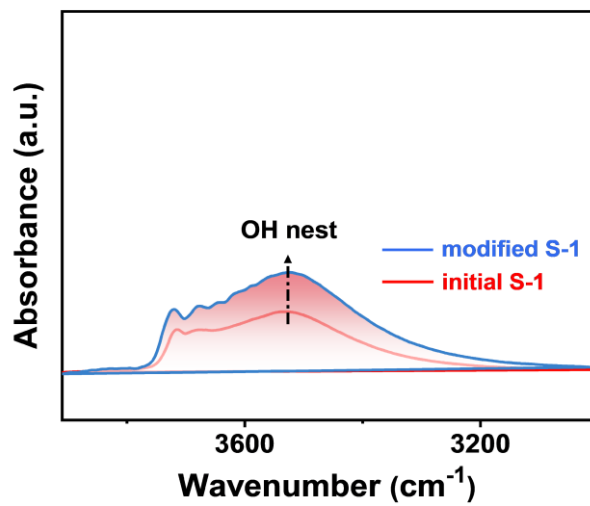

Figure S2 The IR spectra of S-1 zeolite.

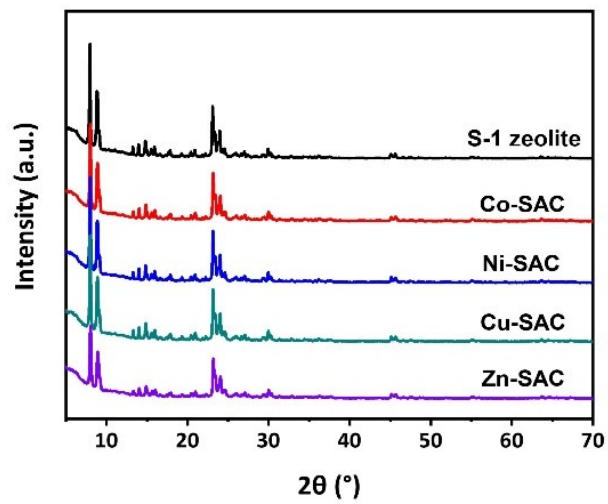

**Figure S3** The XRD patterns of M-SACs.

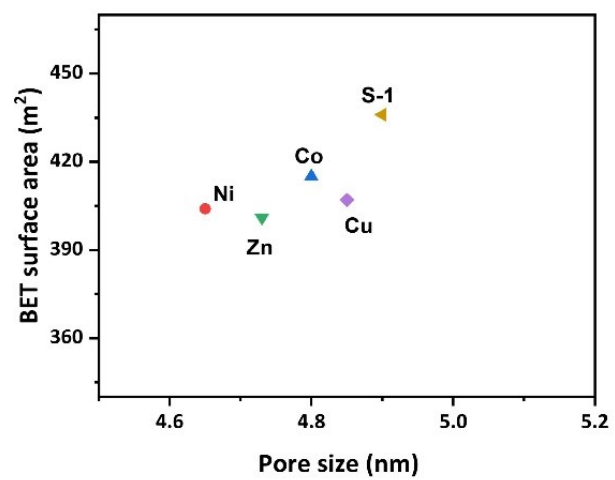

Figure S4 The physical properties data of different catalysts.

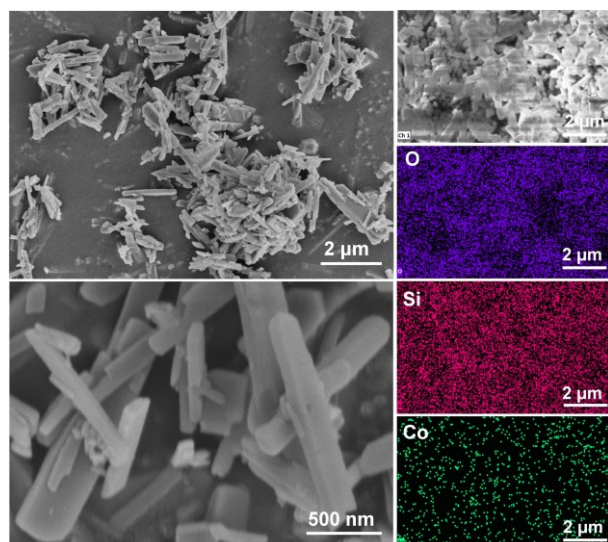

**Figure S5** The SEM images and the corresponding EDS mapping images of the Co-SAC catalyst.

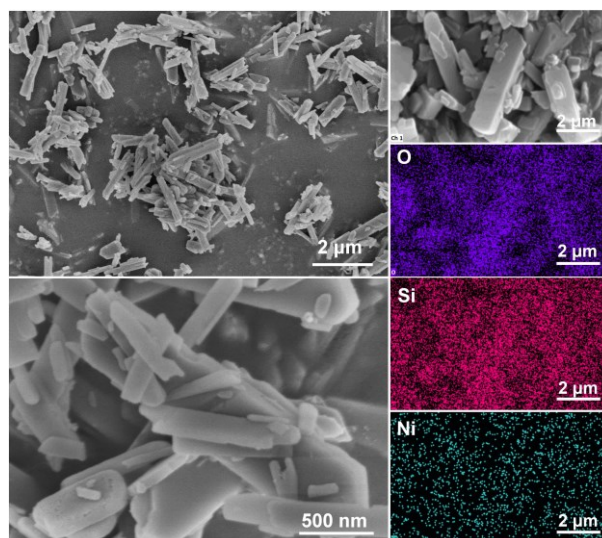

**Figure S6** The SEM images and the corresponding EDS mapping images of the Ni-SAC.



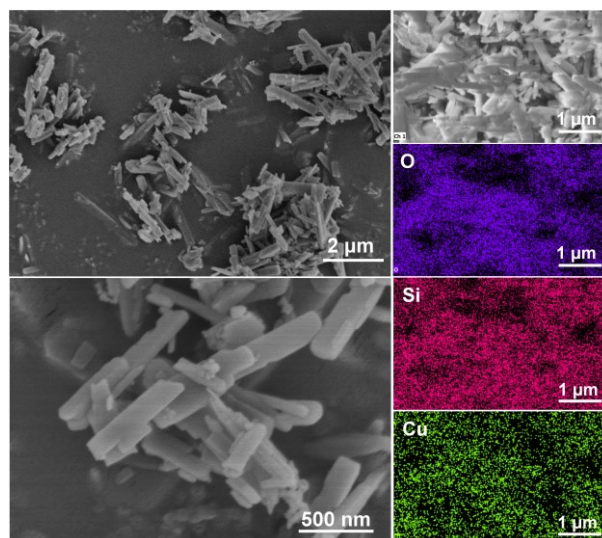

**Figure S7** The SEM images and the corresponding EDS mapping images of the Cu-SAC.

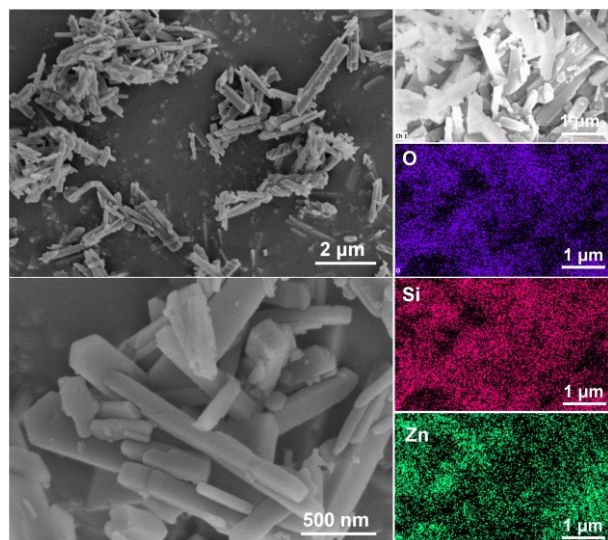

**Figure S8** The SEM images and the corresponding EDS mapping images of the Zn-SAC.

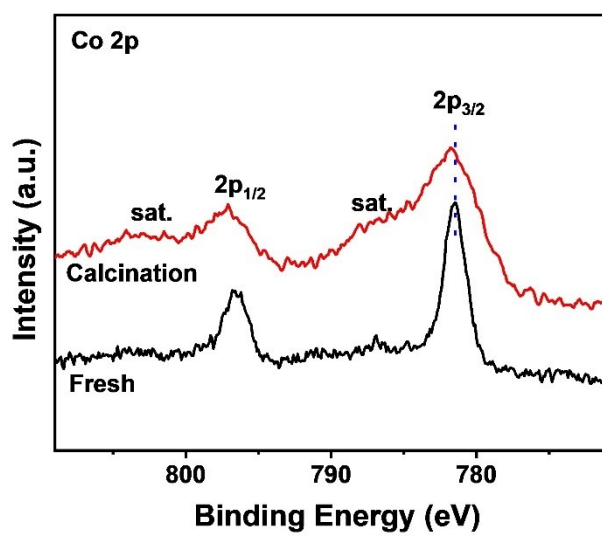

Figure S9 The XPS spectra of the Co-SAC catalysts: fresh catalysts and after calcination.

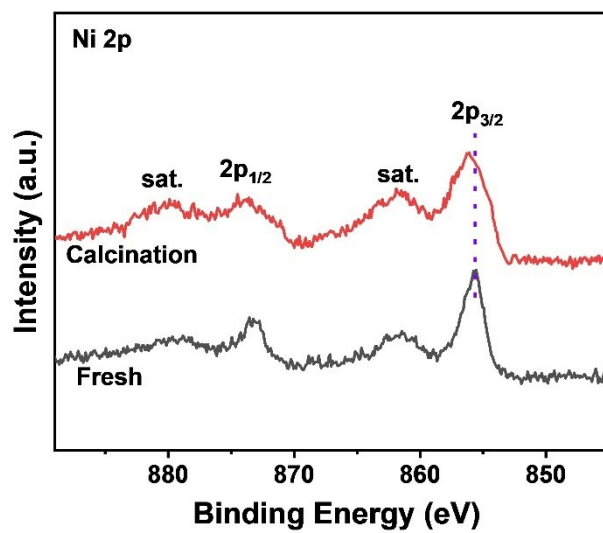

Figure S10 XPS spectra of the Ni-SAC catalysts: fresh catalysts and after calcination.

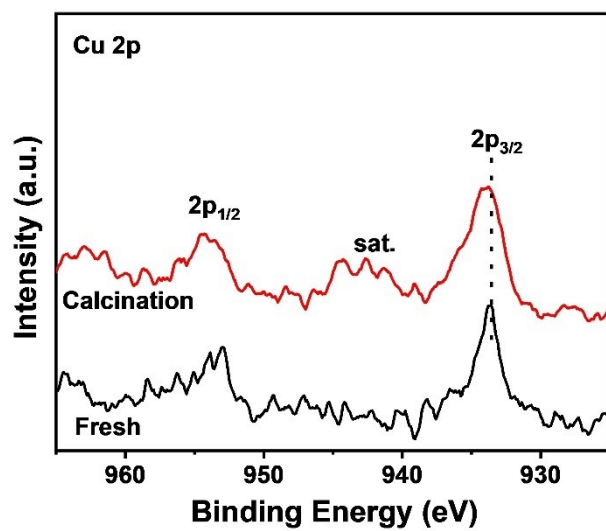

Figure S11 The XPS spectra of the Cu-SAC catalysts: fresh catalysts and after calcination.

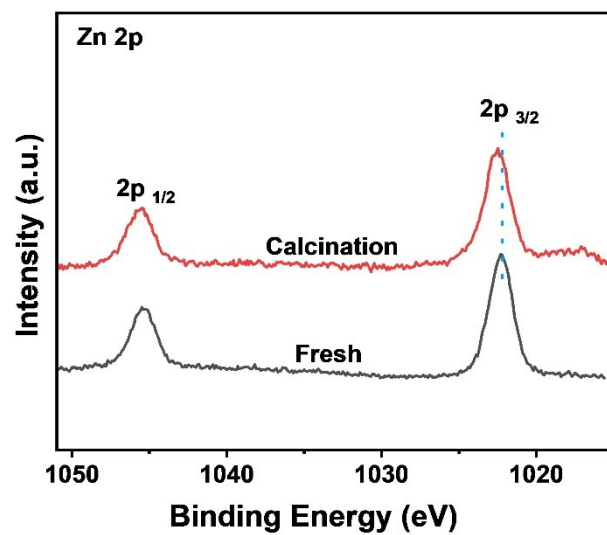

Figure S12 The XPS spectra of the Zn-SAC catalysts: fresh catalysts and after calcination.

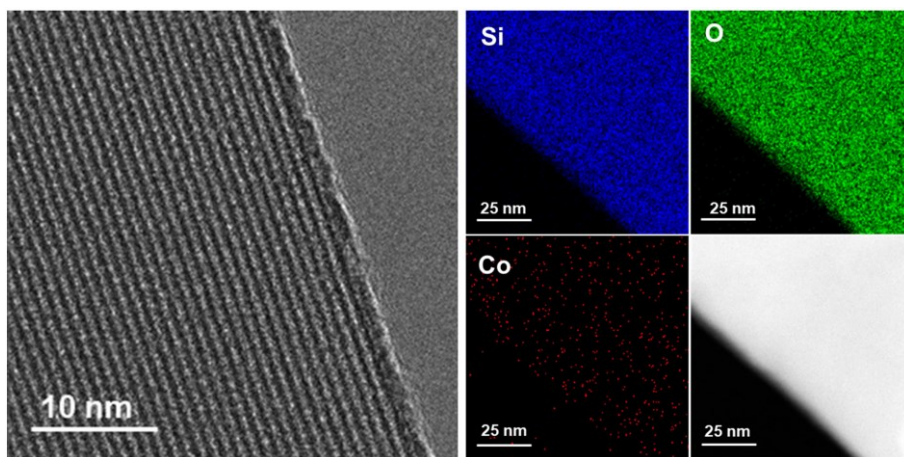

**Figure S13** TEM image and the corresponding EDS mapping images of Co-SAC.

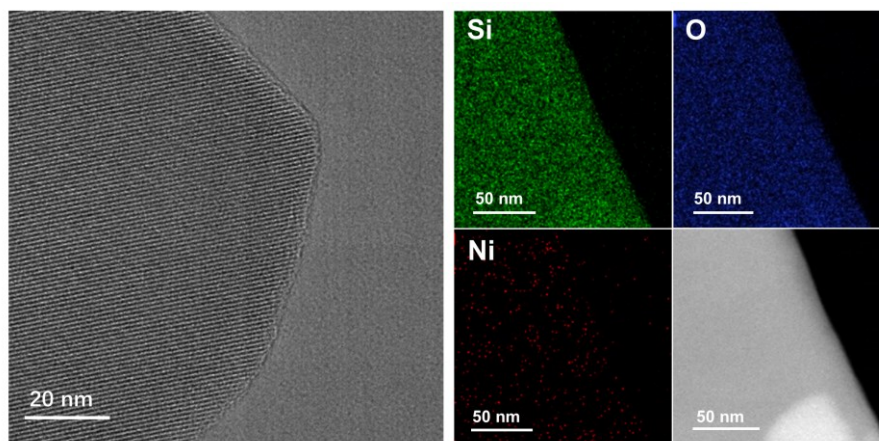

**Figure S14** TEM image and the corresponding EDS mapping images of Ni-SAC.



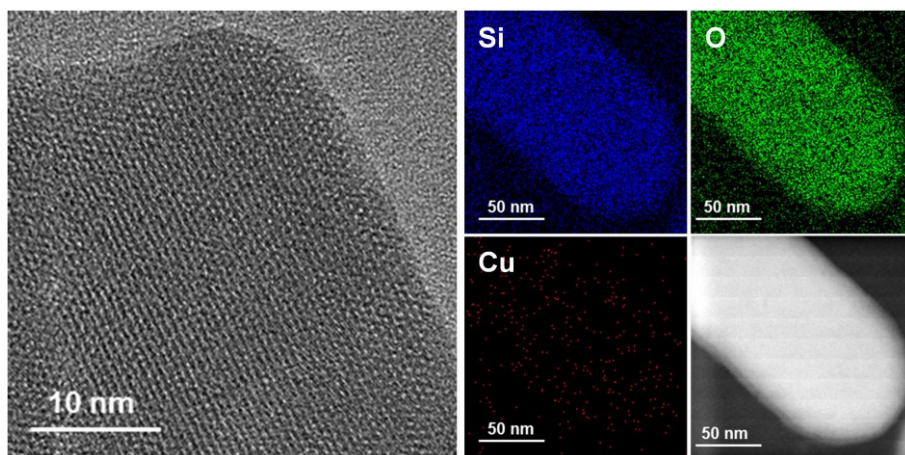

**Figure S15** TEM image and the corresponding EDS mapping images of Cu-SAC.

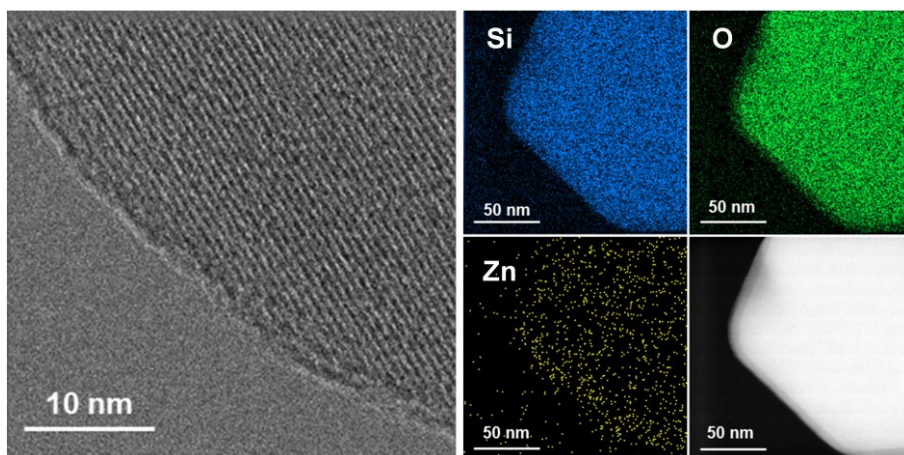

**Figure S16** TEM image and the corresponding EDS mapping images of Zn-SAC.

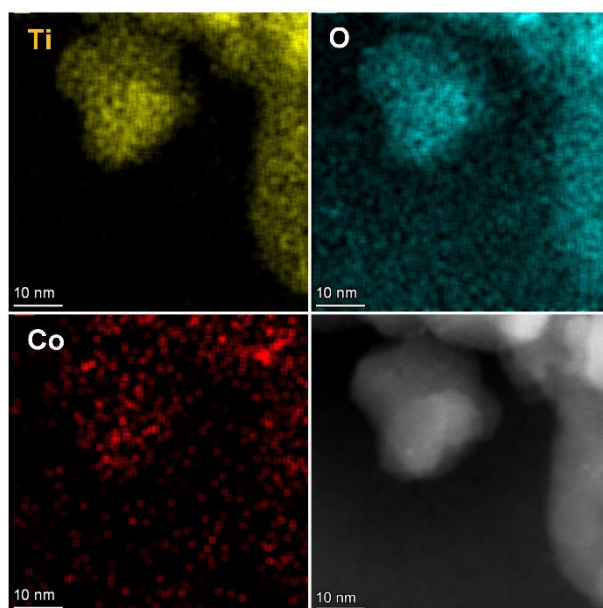

**Figure S17** HADDF-STEM image and the corresponding EDS mapping images of the Co/TiO<sub>2</sub> catalyst.

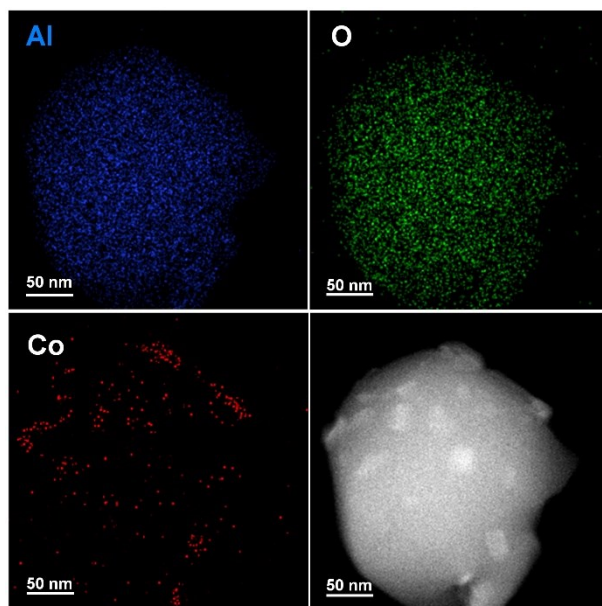

**Figure S18** HADDF-STEM image and the corresponding EDS mapping images of the Co/SiO<sub>2</sub> catalyst.

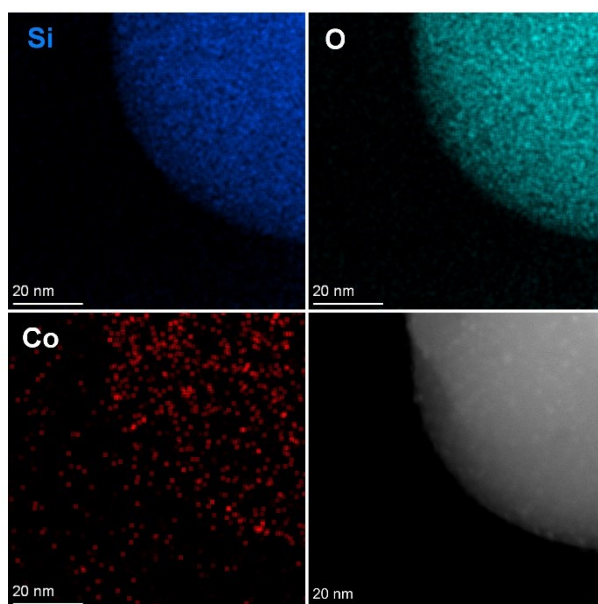

**Figure S19** HADDF-STEM image and the corresponding EDS mapping images of the Co/Al<sub>2</sub>O<sub>3</sub> catalyst.

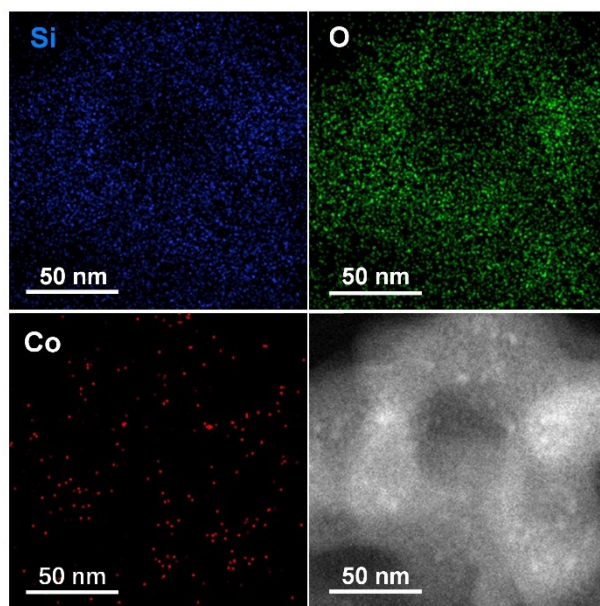

**Figure S20** HADDF-STEM image and the corresponding EDS mapping images of the Co/MCM-41. catalyst.

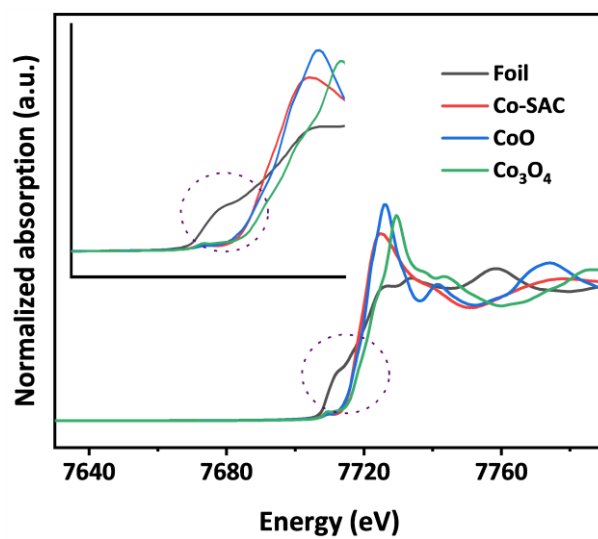

Figure S21 The K-edge near-edge XANES spectra of Co-SAC.

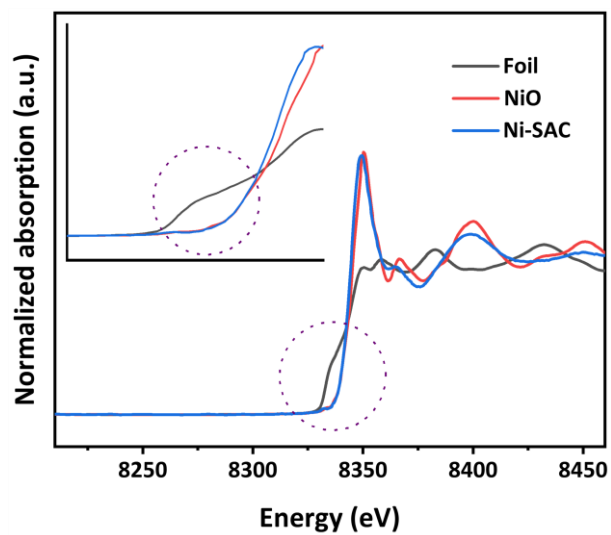

**Figure S22** The K-edge near-edge XANES spectra of Ni-SAC.



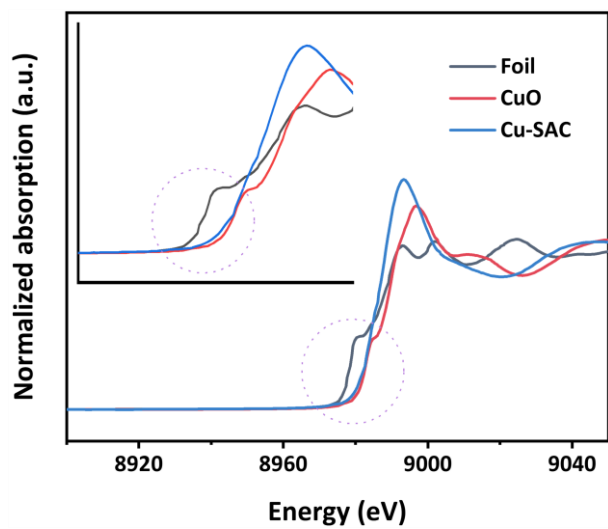

**Figure S23** The K-edge near-edge XANES spectra of Cu-SAC.

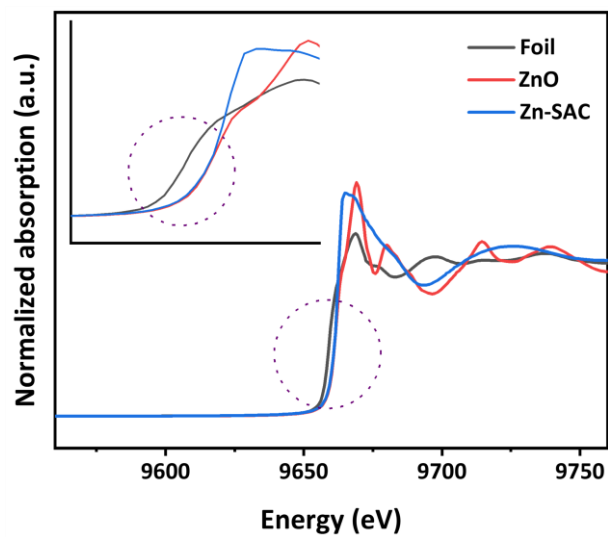

**Figure S24** The K-edge near-edge XANES spectra of Zn-SAC.

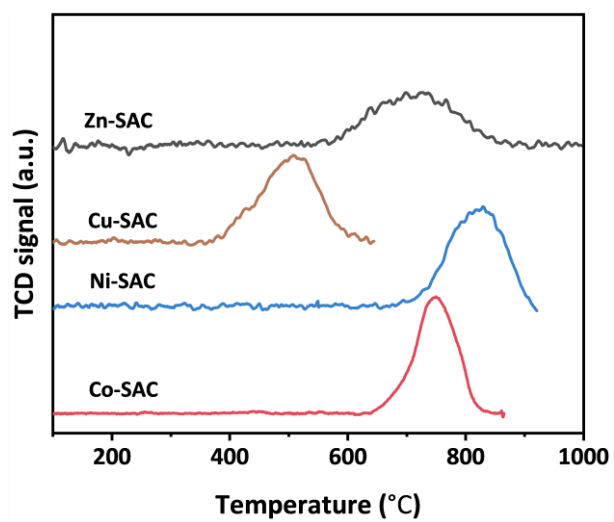

Figure S25 The H<sub>2</sub>-TPR curve of M-SACs.

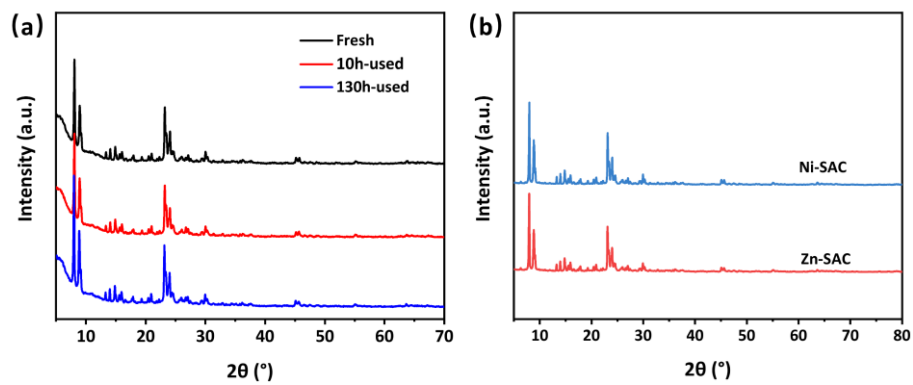

**Figure S26** The XRD patterns of Co-SAC catalysts after reaction (a) and M-SAC catalysts after 10 h reaction (b).

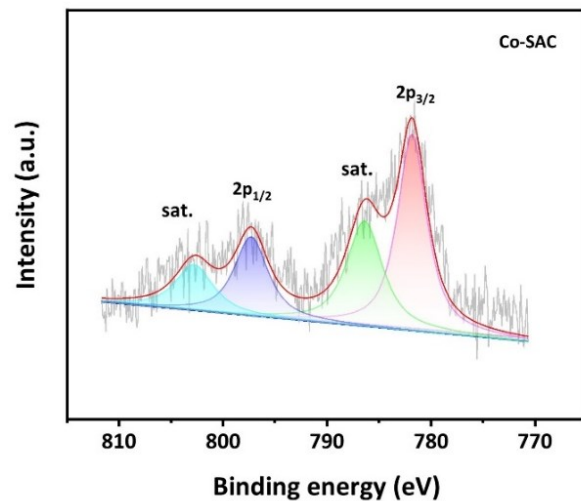

**Figure S27** The XPS patterns of Co-SAC catalysts after 130 h reaction.

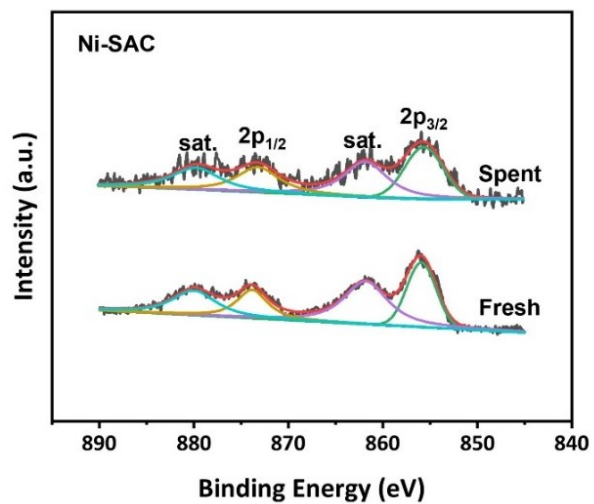

Figure S28 The XPS patterns of Ni-SAC catalysts after reaction

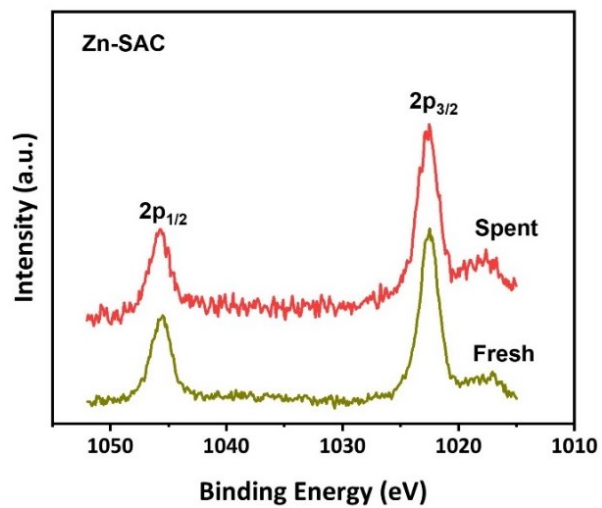

Figure S29 The XPS patterns of Zn-SAC catalysts after reaction.

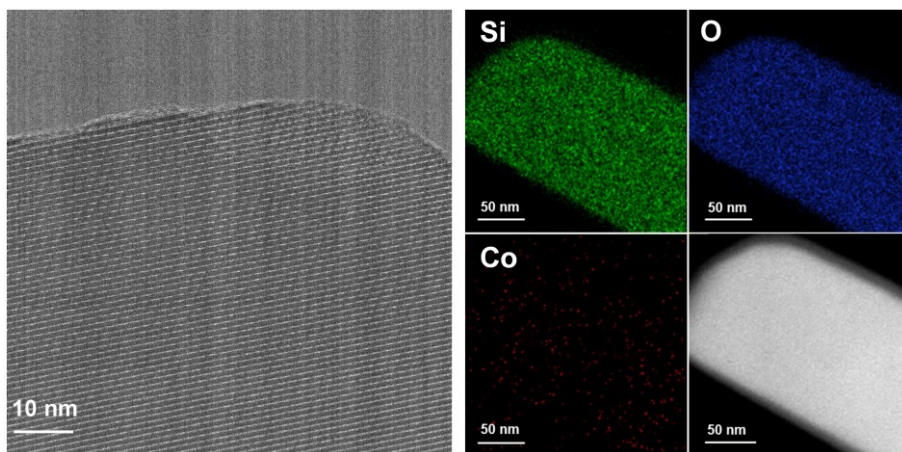

**Figure S30** HADF-STEM image, and the corresponding EDS mapping images of the fresh Co-SAC after 10 h reaction.



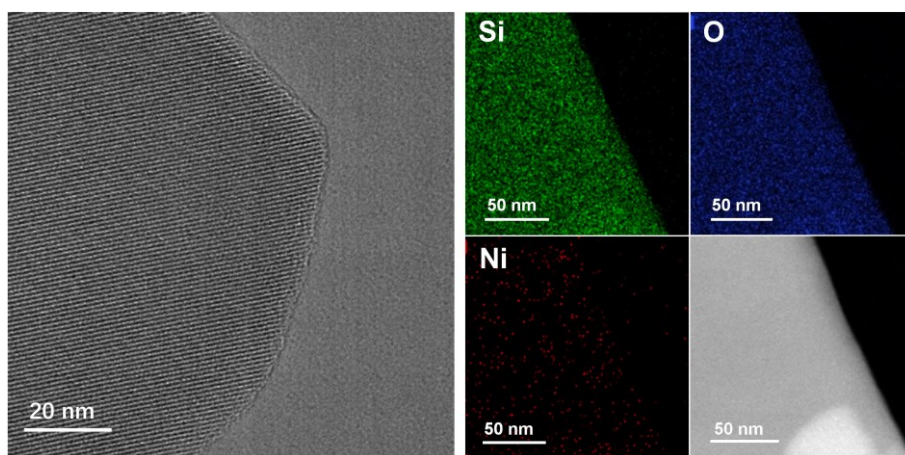

**Figure S31** HADF-STEM image and the corresponding EDS mapping images of the fresh Ni-SAC after 10 h reaction.

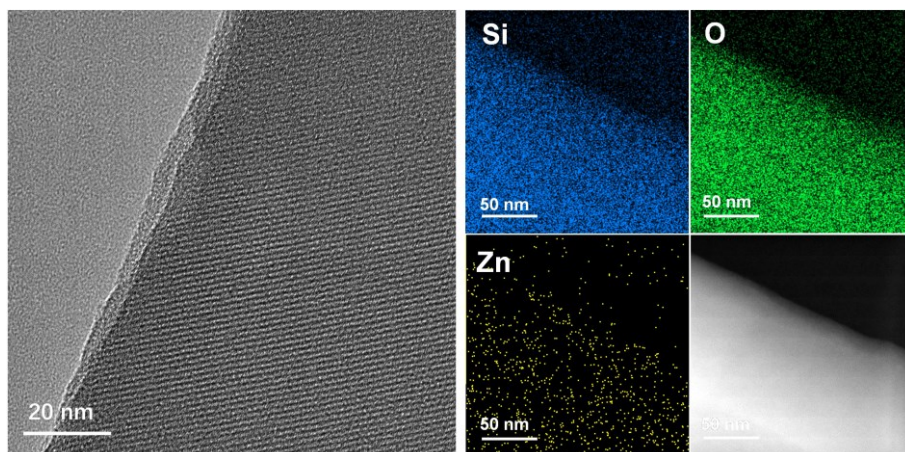

**Figure S32** HADF-STEM image and the corresponding EDS mapping images of the fresh Zn-SAC after 10h reaction.

Table S1. Structural parameters of M-SACs extracted from the EXAFS fitting ( $S_0^2=0.85$ )

| Sample | Path | C.N.             | R (Å)               | $\sigma^2$ ( $10^{-3}\text{Å}^2$ ) | $\Delta E_0$ (eV)   | R-factor |
|--------|------|------------------|---------------------|------------------------------------|---------------------|----------|
| Co-SAC | Co-O | 3.2<br>$\pm 0.5$ | 1.96<br>$\pm 0.012$ | 2.75<br>$\pm 1.75$                 | -1.27<br>$\pm 1.90$ | 0.020    |
| Ni-SAC | Ni-O | 3.5<br>$\pm 0.6$ | 2.06<br>$\pm 0.013$ | 9.0*                               | -7.88<br>$\pm 1.57$ | 0.008    |
| Zn-SAC | Zn-O | 3.2<br>$\pm 0.5$ | 1.93<br>$\pm 0.01$  | 7.0<br>$\pm 1.56$                  | -0.11<br>$\pm 1.47$ | 0.014    |
| Cu-SAC | Cu-O | 3.3<br>$\pm 0.3$ | 1.94<br>$\pm 0.007$ | 4.6<br>$\pm 1.01$                  | -6.42<br>$\pm 1.35$ | 0.008    |

$S_0^2$  is the amplitude reduction factor  $S_0^2=0.85$ ; CN is the coordination number; R is interatomic distance (the bond length between central atoms and surrounding coordination atoms);  $\sigma^2$  is the Debye-Waller factor (a measure of thermal and static disorder in absorber-scatterer distances);  $\Delta E_0$  is edge-energy shift (the difference between the zero kinetic energy value of the sample and that of the theoretical model). R factor is used to value the goodness of the fitting. The obtained XAFS data was processed in Athena (version 0.9.26) for background, pre-edge line and post-edge line calibrations. Then Fourier transformed fitting was carried out in Artemis (version 0.9.26). The  $k^3$  weighting, k-range of 3-12  $\text{Å}^{-1}$  and R range of 1~3  $\text{Å}$  were used for the fitting of foil; k-range of 2-11  $\text{Å}^{-1}$  and R range of 1~3  $\text{Å}$  were used for the fitting of samples.

Table S2. Comparison of the activity of catalysts in present work and reported literatures.

| Catalyst                | Temp.<br>(°C) | Feed composition                                       | Con.<br>(%) | Sel.<br>(%) | K <sub>d</sub><br>(h <sup>-1</sup> ) | Ref.        |
|-------------------------|---------------|--------------------------------------------------------|-------------|-------------|--------------------------------------|-------------|
| K-PtSn@MFI              | 600           | C <sub>3</sub> H <sub>8</sub> : He= 6: 19              | 38.7        | 97          | 0.012                                | 1           |
| K-PtSn@MFI              | 600           | C <sub>3</sub> H <sub>8</sub> : He= 5: 16              | 71          | 88          | 0.019                                | 2           |
| Pt/Fe-3                 | 550           | C <sub>3</sub> H <sub>8</sub> : N <sub>2</sub> = 1: 3  | 47.5        | 90.5        | 0.012                                | 3           |
| PtSn/SiO <sub>2</sub>   | 580           | Pure C <sub>3</sub> H <sub>8</sub>                     | 40.4        | 99          | 0.008                                | 4           |
| ZnO-S-1                 | 550           | C <sub>3</sub> H <sub>8</sub> : N <sub>2</sub> = 2: 3  | 30          | 90          | 0.49                                 | 5           |
| ZnOx/S-1                | 600           | C <sub>3</sub> H <sub>8</sub> : N <sub>2</sub> = 2: 3  | 30.8        | 88          | 0.008                                | 6           |
| Cu-ZnO@S-1              | 600           | C <sub>3</sub> H <sub>8</sub> : H <sub>2</sub> = 7: 3  | 34.4        | 86.5        | 0.025                                | 7           |
| Co-MFI                  | 580           | C <sub>3</sub> H <sub>8</sub> : Ar= 1: 19              | ~58         | 97          | -                                    | 8           |
| Co-SBA-15               | 600           | C <sub>3</sub> H <sub>8</sub> : H <sub>2</sub> = 1: 6  | 37          | 96          | -                                    | 9           |
| Co SAs/SiO <sub>2</sub> | 550           | C <sub>3</sub> H <sub>8</sub> : N <sub>2</sub> =2:6.4  | 25          | 95.1        | 0.009                                | 10          |
| Co-acac@S-1             | 600           | C <sub>3</sub> H <sub>8</sub> : N <sub>2</sub> = 1: 19 | 47          | 94.7        | 0.028                                | 11          |
| Co-SAC                  | 560           | C <sub>3</sub> H <sub>8</sub> : N <sub>2</sub> = 1: 4  | 40.3        | 98          | 0.0045                               | <b>This</b> |

Table S3. Metal content and dispersion of M-SACs.

| Catalyst | Metal content |       | dispersion |
|----------|---------------|-------|------------|
|          | (wt%)         |       |            |
|          | fresh         | spent | (%)        |
| Co-SAC   | 1.5           | 1.49  | 95.2       |
| Ni-SAC   | 1.32          | 1.31  | 93.8       |
| Cu-SAC   | 1.29          | -     | 93.0       |
| Zn-SAC   | 1.17          | 1.15  | 92.5       |

References:

1. Liu, L. C. et al. Structural modulation and direct measurement of subnanometric bimetallic PtSn clusters confined in zeolites. *Nat. Catal.* **2020**, *3*, 628-638.
2. Liu, L. C. et al. Regioselective generation and reactivity control of subnanometric platinum clusters in zeolites for high-temperature catalysis. *Nat. Mater.* **2019**, *18*, 866-873.
3. Liu, H. et al. Isolated Pt Species Anchored by Hierarchical-like Heteroatomic Fe- Silicalite-1 Catalyze Propane Dehydrogenation near the Thermodynamic Limit. *ACS Catal.* **2023**, *13*, 2928-2936.
4. Motagamwala, A. H., Almallahi, R., Wortman, J., Igenegbai, V. O. & Linic, S. Stable and selective catalysts for propane dehydrogenation operating at thermodynamic limit. *Science* **2021**, *373*, 217-222.
5. Zhao, D. et al. In situ formation of ZnOx species for efficient propane dehydrogenation. *Nature* **2021**, *599*, 234-238.
6. Zhao, D. et al. Controlling Reaction-Induced Loss of Active Sites in ZnOx/Silicalite-1 for Durable Nonoxidative Propane Dehydrogenation. *ACS Catal.* **2022**, *12*, 4608-4617
7. Song, S. J. et al. Silicalite-1 Stabilizes Zn-Hydride Species for Efficient Propane Dehydrogenation. *ACS Catal.* **2022**, *12*, 5997-6006.
8. Hu, Z. P. et al. Atomic Insight into the Local Structure and Microenvironment of Isolated Co Motifs in MFI Zeolite Frameworks for Propane Dehydrogenation. *J. Am. Chem. Soc.* **2022**, *144*, 12127-12137
9. Huang, Z. J. et al. Illustrating a new understanding of adsorbed water on silica for inducing tetrahedral cobalt(II) for propane dehydrogenation. *Nat. Commun.* **2023**, *14*, 100.
10. Wang, W. Y. et al. Single Co Sites in Ordered SiO<sub>2</sub> Channels for Boosting Nonoxidative Propane Dehydrogenation. *ACS Catal.* **2022**, *12*, 2632-2638.
11. Song, S. J. et al. In situ encapsulated subnanometric CoO clusters within silicalite-1 zeolite for efficient propane dehydrogenation. *AIChE J.* **2022**, *68*, e17451.
